# Supplementary material for: Performance of Dried Blood Spots Compared with Serum Samples for Measuring Dengue Seroprevalence in a Cohort of Children in Cebu, Philippines
Source: PubMed Central journal article supplement (PMC7790110; doi:10.4269/ajtmh.20-0937), 2020-11-02
Supplement: tpmd200937.SD1.pdf [file tpmd200937.SD1.pdf]

## Supplementary material

**AJTMH-20-0937, The performance of dried blood spots compared with serum samples for measuring dengue seroprevalence in a cohort of children in Cebu, Philippines by Daag, Jedas; Ylade, Michelle; Jadi, Ramesh; Adams, Cameron; Cuachin, Anna; Alpay , Riacarl ; Aportadera, Emma ; Yoon, In-Kyu; de Silva, Aravinda; Lopez, Anna; Deen, Jacqueline**

**Table S1. Studies evaluating dried serum or blood on filter paper compared with serum samples for detection of anti-DENV antibodies**

| Reference                           | Country                        | Dengue antibody detection | Participants                                                     | Serologic assay                                                                                                             | Specimens compared*                                                                    | Sensitivity of DBS/DSS versus sera | Specificity of DBS/DSS versus sera |
|-------------------------------------|--------------------------------|---------------------------|------------------------------------------------------------------|-----------------------------------------------------------------------------------------------------------------------------|----------------------------------------------------------------------------------------|------------------------------------|------------------------------------|
| Kuno, 1991 <sup>1</sup>             | Puerto Rico                    | IgM and IgG               | patients with suspected acute dengue infection                   | In-house enzyme-linked immunosorbent assay (ELISA)                                                                          | <ul style="list-style-type: none"> <li>• Sera</li> <li>• DBS</li> </ul>                | 97 IgM<br>96 IgG                   | 97 IgM<br>91 IgG                   |
| Ruangturakit, 1994 <sup>2</sup>     | Thailand                       | IgM and IgG               | <b>133</b> patients with suspected acute dengue infection        | In-house ELISA                                                                                                              | <ul style="list-style-type: none"> <li>• Sera</li> <li>• DBS</li> <li>• DSS</li> </ul> | N/A                                | N/A                                |
| 1996 <sup>3</sup>                   | Costa Rica, Nicaragua and Cuba | IgM                       | <b>118</b> patients with suspected acute dengue infection        | Dengue IgM kit (Institute of Tropical Medicine, Cuba).                                                                      | <ul style="list-style-type: none"> <li>• Sera</li> <li>• DBS</li> </ul>                | 98.1%                              | 98.5%                              |
| de la C. Herrera, 2006 <sup>4</sup> | Cuba                           | IgM                       | <b>189</b> patients with suspected acute dengue infection        | Dengue IgM Ultramicro ELISA (UMELISA)                                                                                       | <ul style="list-style-type: none"> <li>• Sera</li> <li>• DBS</li> </ul>                | 92.1%                              | 98.6%                              |
| Tran, 2006 <sup>5</sup>             | Vietnam                        | IgM and IgG               | <b>781</b> febrile patients provided acute and convalescent sera | Dengue IgM capture ELISA (Focus diagnostics, Cypress, CA, USA) and indirect IgG ELISA (Focus diagnostics, Cypress, CA, USA) | <ul style="list-style-type: none"> <li>• Sera</li> <li>• DBS</li> </ul>                | N/A                                | N/A                                |
| Matheus, 2008                       | French                         | IgM                       | <b>130</b> patients with                                         | In-house ELISA                                                                                                              | <ul style="list-style-type: none"> <li>• Sera</li> </ul>                               | 81.6%                              | 74.9%                              |

|                                         |           |                  |                                                                                                                                                                         |                                                     |                                                                         |                                                                                              |                                                                                              |
|-----------------------------------------|-----------|------------------|-------------------------------------------------------------------------------------------------------------------------------------------------------------------------|-----------------------------------------------------|-------------------------------------------------------------------------|----------------------------------------------------------------------------------------------|----------------------------------------------------------------------------------------------|
| 6                                       | Guiana    |                  | suspected acute dengue infection (93 samples were collected 1-4 days after the onset of fever and 37 samples after 4 <sup>th</sup> day)                                 |                                                     | <ul style="list-style-type: none"> <li>• DBS</li> </ul>                 |                                                                                              |                                                                                              |
| Balmaseda, 2008 <sup>7</sup>            | Nicaragua | IgA, IgM and IgG | <p><b>356</b> febrile patients provided acute and convalescent sera</p> <p><b>322</b> participants provided pre- and post-dengue season samples to assess incidence</p> | In-house ELISA                                      | <ul style="list-style-type: none"> <li>• Sera</li> <li>• DBS</li> </ul> | <p>95.6%-IgM for diagnosis</p> <p>59.2%-IgM for incidence</p> <p>86.0%-IgG for incidence</p> | <p>88.9%-IgM for diagnosis</p> <p>81.1%-IgM for incidence</p> <p>92.4%-IgG for incidence</p> |
| Anders, 2012 <sup>8</sup>               | Vietnam   | IgM and IgG      | <b>44</b> patients with NS1 positive acute dengue infection                                                                                                             | Capture IgM and IgG (MAC/GAC) ELISA                 | <ul style="list-style-type: none"> <li>• Sera</li> <li>• DBS</li> </ul> | 100%                                                                                         | 100%                                                                                         |
| Chakravarti, 2013 <sup>9</sup>          | India     | IgM              | 104 suspected cases of dengue fever                                                                                                                                     | N/A                                                 | <ul style="list-style-type: none"> <li>• Sera</li> <li>• DBS</li> </ul> | N/A                                                                                          | N/A                                                                                          |
| Maldonado-Rodríguez, 2017 <sup>10</sup> | Mexico    | IgG (IgM**)      | <b>66</b> patients with suspected acute dengue infection (blood was collected about 4 days after the onset of fever)                                                    | Dengue Virus IgG kit (DRG International, Inc., USA) | <ul style="list-style-type: none"> <li>• Sera</li> <li>• DSS</li> </ul> | 94.2%                                                                                        | 93.3%                                                                                        |

\* DBS – dried blood spots; DSS - dried serum spots

\*\* Only four samples were positive for IgM in the serum assay and only one of these was also positive in the DSS assay.

## References

1. Kuno G, Gomez I, Gubler DJ, 1991. An ELISA procedure for the diagnosis of dengue infections. *J Virol Methods* 33: 101-13.
2. Ruangturakit S, Rojanasuphot S, Srijuggravanvong A, Duangchanda S, Nuangplee S, Igarashi A, 1994. Storage stability of dengue IgM and IgG antibodies in whole blood and serum dried on filter paper strips detected by ELISA. *Southeast Asian J Trop Med Public Health* 25: 560-4.
3. 1996. Utilization of blood samples taken on filter paper for detection of IgM antibodies to dengue virus. *Epidemiol Bull* 17: 11.
4. de la CHR, Cabrera MV, Garcia S, Gilart M, 2006. IgM antibodies to dengue virus in dried blood on filter paper. *Clin Chim Acta* 367: 204-6.
5. Tran TN, de Vries PJ, Hoang LP, Phan GT, Le HQ, Tran BQ, Vo CM, Nguyen NV, Kager PA, Nagelkerke N, Groen J, 2006. Enzyme-linked immunoassay for dengue virus IgM and IgG antibodies in serum and filter paper blood. *BMC Infect Dis* 6: 13.
6. Matheus S, Meynard JB, Lacoste V, Morvan J, Deparis X, 2007. Use of capillary blood samples as a new approach for diagnosis of Dengue virus infection. *J Clin Microbiol* 45: 887-90.
7. Balmaseda A, Saborio S, Tellez Y, Mercado JC, Perez L, Hammond SN, Rocha C, Kuan G, Harris E, 2008. Evaluation of immunological markers in serum, filter-paper blood spots, and saliva for dengue diagnosis and epidemiological studies. *J Clin Virol* 43: 287-91.
8. Anders KL, Nguyet NM, Quyen NTH, Ngoc TV, Tram TV, Gan TT, Tung NT, Dung NT, Chau NVV, Wills B, Simmons CP, 2012. An evaluation of dried blood spots and oral swabs as alternative specimens for the diagnosis of dengue and screening for past dengue virus exposure. *Am J Trop Med Hyg* 87: 165-170.
9. Chakravarti A, Siddiqui O, Malik S, Uppal B, 2013. Use of dried blood blotted on filter paper to detect dengue IgM antibody and dengue NS1 antigen. *Southeast Asian J Trop Med Public Health* 44: 226-31.
10. Maldonado-Rodriguez A, Rojas-Montes O, Vazquez-Rosales G, Chavez-Negrete A, Rojas-Uribe M, Posadas-Mondragon A, Aguilar-Faisal L, Cevallos AM, Xoconostle-Cazares B, Lira R, 2017. Serum Dried Samples to Detect Dengue Antibodies: A Field Study. *Biomed Res Int* 2017: 7215259.
